# Supplementary material
Source: PubMed Central journal article supplement (PMC5467105)
Supplement: Supp_Table1.pdf [file Supp_Table1.pdf]

## Supplementary Data

SUPPLEMENTARY TABLE S1. EFFECTS OF 26 WEEKS OF CONTINUOUS GLUCOSE MONITORING ON QUALITY OF GLYCEMIC CONTROL, HYPOGLYCEMIA, HYPERGLYCEMIA, AND GLYCEMIC VARIABILITY

| Parameter                                  | %Change after 26 weeks of CGM | <i>t</i> value for change, baseline to 26 weeks | p value (calculated, 2- sided, df ~ 100) | Description                                                                                                                               |
|--------------------------------------------|-------------------------------|-------------------------------------------------|------------------------------------------|-------------------------------------------------------------------------------------------------------------------------------------------|
| <b>Average glucose level</b>               |                               |                                                 |                                          |                                                                                                                                           |
| <b>HbA1c</b> (mmol/mol) (%)                | -3.28                         | -5.4                                            | $4.5 \times 10^{-7}$                     | Hemoglobin A1c, reflecting Average Glucose                                                                                                |
| <b>Mean Glucose</b> (mmol/L)               | -3.69                         | -3.9                                            | $1.7 \times 10^{-4}$                     | Average Glucose, measured directly by CGM                                                                                                 |
| <b>Hyper- and Hypoglycemia</b>             |                               |                                                 |                                          |                                                                                                                                           |
| <b>HBGI</b>                                | -14.9                         | -6.7                                            | $1.2 \times 10^{-9}$                     | Hyperglycemia                                                                                                                             |
| <b>LBGI</b>                                | -24.5                         | -6.0                                            | $3.2 \times 10^{-8}$                     | Hypoglycemia                                                                                                                              |
| <b>Overall Quality of Glycemic Control</b> |                               |                                                 |                                          |                                                                                                                                           |
| <b>M-value</b>                             | -25.8                         | -8.0                                            | $2.3 \times 10^{-12}$                    | Overall Quality                                                                                                                           |
| <b>GRADE</b>                               | -16.5                         | -6.4                                            | $5.1 \times 10^{-9}$                     | Overall Quality                                                                                                                           |
| <b>J-Index</b>                             | -9.96                         | -5.1                                            | $1.6 \times 10^{-6}$                     | Overall Quality and Variability: utilizes (mean and SD) <sup>2</sup> (sensitive to hyperglycemia, relatively insensitive to hypoglycemia) |
| <b>Glycemic Variability</b>                |                               |                                                 |                                          |                                                                                                                                           |
| <b>MODD</b>                                | -8.16                         | -6.0                                            | $3.2 \times 10^{-8}$                     | Variability: between days, for each time of day                                                                                           |
| <b>SD</b>                                  | -6.46                         | -5.3                                            | $6.9 \times 10^{-7}$                     | Variability: overall, within and between days                                                                                             |
| <b>CONGA<sub>1</sub></b>                   | -5.18                         | -4.9                                            | $3.7 \times 10^{-6}$                     | Variability: hour to hour                                                                                                                 |
| <b>MAGE</b>                                | -6.81                         | -4.0                                            | $1.2 \times 10^{-4}$                     | Variability: major changes during the day (? postprandial)                                                                                |
| <b>%CV</b>                                 | -3.61                         | -3.9                                            | $1.7 \times 10^{-4}$                     | Variability: SD as percentage of mean                                                                                                     |
| <b>ADRR</b>                                | -6.27                         | -3.6                                            | $5.0 \times 10^{-4}$                     | Variability: Greatest Risk of Highs + Greatest Risk of Lows, for each day, averaged over days                                             |

Based on analysis by El Laboudi et al. (Table 5 of El Laboudi et al.<sup>11</sup> using data from JDRF-CGM study<sup>6,7</sup>). Parameters have been rearranged by category; *P*-values are calculated from the paired *t* tests without truncation.

The significance level for changes in HbA1c following introduction of CGM was greater than for the changes in mean glucose by 2.5 orders of magnitude, even though the latter was based on CGM. The level of significance for SD was three orders of magnitude greater than for MAGE, %CV, or ADRR, implying that SD is one of the most sensitive indicators of changes in glycemic variability. There were unusually high levels of significance for quality of glycemic control M, GRADE, J index, risks of hypo- and hyperglycemia, and glycemic variability (MODD, SD, and CONGA<sub>1</sub>). These *P*-values are based on comparisons between 26 weeks and baseline within the same individual, not considering the between-subject variability involved when making comparisons with a control group.

CGM, continuous glucose monitoring.
